1 Genomic Analysis of Human Noroviruses Using Hybrid Illumina-Nanopore  
2 Data

3

4 Annika Flint <sup>1</sup>, Spencer Reaume <sup>2</sup>, Jennifer Harlow <sup>2</sup>, Emily Hoover <sup>1</sup>, Kelly Weedmark <sup>1</sup>, Neda  
5 Nasheri <sup>2,3</sup>

6 1- Genomics Laboratory, Bureau of Microbial Hazards, Health Canada, Ottawa, ON,  
7 Canada

8 2- National Food Virology Reference Centre, Bureau of Microbial Hazards, Health Canada,  
9 Ottawa, ON, Canada

10 3- Department of Biochemistry, Microbiology and Immunology, Faculty of Medicine,  
11 University of Ottawa, ON, Canada

12

13 Corresponding author: Neda Nasheri [neda.nasheri@canada.ca](mailto:neda.nasheri@canada.ca)

14

15

16 **Abstract**

17 Whole genome sequence (WGS) analysis of noroviruses is routinely performed by employing a  
18 metagenomic approach. While this methodology has several advantages, such as allowing for  
19 examination of co-infection, it has some limitations such as the requirement of high viral load to  
20 achieve full-length or near full-length genomic sequences. In this study, we used an  
21 amplification approach to obtain full-length genomic amplicons from 39 Canadian GII isolates  
22 followed by deep sequencing on Illumina and Oxford Nanopore platforms. This approach  
23 significantly reduced the required viral titre to obtain full-genome coverage. Herein, we  
24 compared the coverage and sequences obtained by both platforms and provided an in-depth  
25 genomic analysis of the obtained sequences, including the presence of single nucleotide variants  
26 (SNVs) and recombination events.

27 **Keywords:**

28 Norovirus, full-length amplicons, Illumina MiSeq, Oxford Nanopore, single nucleotide variant,  
29 and recombination

## 30 **Introduction**

31 Noroviruses are the most common agent causing acute gastroenteritis leading to an estimated  
32 684 million illnesses and approximately \$60 billion in societal costs worldwide (Bartsch, et al.  
33 2016). There are currently no vaccines or therapeutics licensed against norovirus (Cates, et al.  
34 2020). Norovirus transmission primarily occurs by person-to-person contact through the fecal-  
35 oral route or contaminated food and surfaces (Teunis, et al. 2015).

36 Noroviruses belong to the *Caliciviridae* family and have a 7.5 kb, positive sense, single-stranded  
37 RNA genome that is enclosed in a non-enveloped icosahedral capsid (Green. 2013). The genome  
38 is organized into three open reading frames (ORFs). ORF1 encodes a polyprotein that is cleaved  
39 into six non-structural viral proteins, including the RNA-dependent RNA polymerase (RdRp).  
40 ORF2 encodes VP1, the major structural capsid protein, and ORF3 encodes VP2, a minor  
41 structural capsid protein (Green. 2013). Noroviruses are considered fast-evolving viruses (de  
42 Graaf, et al. 2016), and their genomes are tremendously diverse due to accumulation of point  
43 mutations and recombination (Parra. 2019). To date, noroviruses are classified into at least 10  
44 genogroups. Noroviruses are further classified into at least 49 genotypes based on the diversity  
45 of ORF2 and 60 types based on the diversity of the RNA-dependent-RNA polymerase (RdRP)  
46 gene (Chhabra, et al. 2019).

47 Whole genome sequencing (WGS) of noroviruses, which is often carried out through  
48 metagenomic approaches, has allowed for source attribution, lineage analysis, identification of  
49 recombination events and variant analysis (Parra and Green. 2015, Nasheri, et al. 2017,  
50 Petronella, et al. 2018). However, high viral titre is required to obtain full-genome coverage  
51 through metagenomics approaches (Nasheri, et al. 2017). Alternatively, amplicon-based

52 sequencing using sequence-specific primer sets decreases the viral load requirement in the  
53 sample, but introduces amplification bias and assumes conserved viral synteny, which could lead  
54 to overlooking genomic variations (Cotten, et al. 2014). Parra and colleagues have recently  
55 developed a method to amplify full-length norovirus GII genomes followed by the use of the  
56 Illumina platform to obtain deep sequencing data on the full-genome amplicons (Parra, et al.  
57 2017).

58 Third generation sequencing devices such as Oxford Nanopore's MinION, which can produce  
59 long reads up to 100's of kilobases, has become the method of choice to elucidate viral  
60 recombination and to identify subgenomic sequences (Viehweger, et al. 2019). On the other  
61 hand, second-generation sequencing technologies like Illumina, despite a low error rate, are  
62 restricted by read-length ( $\leq 300$  nt) which, even using paired-end  $2 \times 300$  sequencing, considerably  
63 complicates the investigation of recombination and identification of subgenomic sequences.  
64 However, adoption of MinION sequencing for routine surveillance of viruses has been limited  
65 due to concerns of sequence accuracy (Bull, et al. 2020). To overcome this concern, we  
66 performed amplicon-based long-read MinION and short-read paired-end Illumina MiSeq on  
67 matched norovirus-positive stool samples.

68 The aim of this study is to combine Illumina and Oxford Nanopore sequencing to reconstruct a  
69 highly accurate consensus sequence of the norovirus isolates and to provide insight into the viral  
70 recombination and genetic diversity.

## 71 **Materials and Methods**

### 72 **Samples**

73 The norovirus GII positive samples are from the British Columbia Centre for Disease Control  
74 (BMH19-089 to BMH19-137), obtained in winter and spring 2019, and from the archive of the  
75 National Food Virology Reference Centre at Health Canada (BMH11-021, BMH12-030, BMH  
76 13-039, BMH14-054, BMH14-056, BMH15-059, BMH15-063, BMH16-074, BMH16-077,  
77 BMH18-086, and BMH18-087), which were obtained from winter 2011 to spring 2018. The  
78 presence of norovirus GII RNA was confirmed by droplet digital PCR (Bio-Rad, Hercules,  
79 California, USA) using the probes and primers that were described previously (Nasheri, et al.  
80 2017, Petronella, et al. 2018). The samples either were from an outbreak or were sporadic. An  
81 outbreak includes >2 epidemiologically linked cases with >1 norovirus-positive sample. This  
82 study has been granted an exemption from requiring ethics approval by Health Canada and a  
83 formal consent was not required because the study participants were anonymized.

#### 84 **RNA Extraction and Full-length Amplicon Generation**

85 Full-length amplicons were generated as described before (Parra, et al. 2017). Briefly, 10% stool  
86 suspensions were clarified by centrifugation ( $6000 \times g$  for 5 min) and the supernatant was  
87 filtered through a 0.45  $\mu\text{M}$  then 0.22  $\mu\text{M}$  filter (Millipore, Etobicoke, Ontario, Canada). RNA  
88 was extracted from filtrate using the MagMax Viral RNA Isolation Kit (Ambion) following  
89 manufacturer's recommendations. Complementary DNA was synthesized from the viral RNA  
90 using the Tx30SXN primer  
91 (GACTAGTTCTAGATCGCGAGCGGCCGCCCTTTTTTTTTTTTTTTTTTTTTTTTTTTTTTTTTTTTTTTT  
92 (Katayama, et al. 2002), and the Maxima H Minus First Strand cDNA Synthesis Kit (Thermo  
93 Fisher Scientific). Amplification of the full-length genome was performed using a set of primers  
94 that target the conserved regions of the 5'- and 3'-end of GII noroviruses (GII1-35:

95 GTGAATGAAGATGGCGTCTAACGACGCTTCCGCTG, and Tx30SXN), and the SequalPrep  
96 Long PCR Kit (Invitrogen) following manufacturer's recommendations.

### 97 **Viral RNA Load Determination**

98 Viral titres were determined by droplet digital PCR (Bio-Rad, Hercules, California, USA) using  
99 the probes and primers that were described previously (Nasheri, et al. 2017, Petronella, et al.  
100 2018).

### 101 **Sanger Sequencing**

102 Samples that did not generate full-length replicons after 3 attempts were subjected to dual typing  
103 by Sanger sequencing. For this purpose, we performed conventional RT-PCR targeting of a 570  
104 bp product that includes the 3'-end of the polymerase region and 5'-end of the major capsid gene  
105 followed by Sanger sequencing, as described previously (Cannon, et al. 2019).

### 106 **Illumina Sequencing**

107 Norovirus libraries were constructed using the NexteraXT DNA Library Preparation Kit and  
108 Nextera XT Index Kit v2 according to the manufacturer's instructions (Illumina Inc.). Paired-end  
109 Illumina sequencing was performed on a MiSeq instrument (v3 chemistry, 2 × 300 bp) according  
110 to manufacturer instructions (Illumina Inc.).

### 111 **Oxford Nanopore Sequencing**

112 Norovirus cDNA samples were treated with 0.16 mg/mL RNase A (100 mg/mL, Qiagen) for 30  
113 minutes at 37 °C. Samples were subsequently size selected using modified SPRI magnetic beads  
114 to remove DNA fragments < 1500 bp (Hosomichi, et al. 2014). Briefly, 1mL of Ampure XP

115 beads (Beckman Coulter) was applied to a magnetic stand and the supernatant was discarded.  
116 The beads were resuspended in 0.5 mL of 20% PEG, 2.5 M NaCl solution. The modified SPRI  
117 beads were added to DNA samples at a 0.35× volume and incubated for 5 minutes at room  
118 temperature. Samples were applied to a magnetic stand, the supernatant discarded and beads  
119 washed 2× with 125 µL 80% ethanol. The beads were air dried for 30 seconds followed by  
120 incubation for 2 minutes at room temperature in 45 µL H<sub>2</sub>O. Samples were applied to a magnetic  
121 stand and the eluted DNA was quantified using a Qubit 4 fluorometer (Fisher).

122 DNA libraries were constructed using the Ligation Sequencing Kit 1D (SQK-LSK108) and the  
123 PCR Barcoding Expansion 1-12 Kit (EXP-PBC001) according to the manufacturer protocol  
124 (Oxford Nanopore Technologies, Oxford Science Park, UK). Twelve barcoded libraries were  
125 pooled per run and sequenced on a 1D MinION device (R9.4, FLO-MIN106) using FLO-  
126 MIN106 flow cells for up to 24 hrs. Signal processing, base calling, demultiplexing and adapter  
127 trimming were performed using the Guppy (Guppy GPU v 3.3.3+fa743ab).

## 128 **Bioinformatic Analysis**

### 129 *Read processing, de novo whole genome assembly and genome annotation*

130 Illumina dataset quality was assessed by FastQC (v0.11.8) followed by read processing using  
131 Fastp (v 0.20.0) (Chen, et al. 2018) to remove adapter and barcode sequences, correct  
132 mismatched bases in overlaps, and filter low-quality reads. Nanopore dataset quality was  
133 analyzed using NanoPlot (v1.20.0) (De Coster, et al. 2018) and full genome length Nanopore  
134 reads 7.5 -7.7 kb were extracted using NanoFilt (v2.7.1) (De Coster, et al. 2018). Nanopore reads  
135 were taxonomically classified using Kaiju (v1.7.3) (Menzel, et al. 2016) and the viral Kaiju

136 database (NCBI RefSeq database curated 25/05/2020). The top scoring read was extracted using  
137 Seqtk (v1.3, <https://github.com/lh3/seqtk>) and non-norovirus GII specific reads were discarded.  
138 Error correction of the full genome length Nanopore read for each sample was performed using  
139 the consensus function of Medaka (v1.1.3, <https://github.com/nanoporetech/medaka>) and  
140 Medaka model r941\_min\_fast\_g303 to polish the sequence using Nanopore long reads. The  
141 sequence was further polished using Pilon (v1.23) (Walker, et al. 2014) and Illumina short reads  
142 using default parameters to obtain the consensus sequence. The whole genome sequences were  
143 genotyped using the Norovirus Genotyping Tool v2.0 (Kroneman, et al. 2011) and annotated  
144 using Vapid (v1.6.6) (Shean, et al. 2019) and the Vapid viral database (NCBI complete viral  
145 genomes curated 01/05/2018).

#### 146 *Coverage plots*

147 Illumina and Nanopore reads were mapped to the norovirus *de novo* whole genomes using  
148 BMAP (v38.18, <https://sourceforge.net/projects/bbmap>). Depth of coverage was assessed using  
149 the Samtools depth function (v1.7, <https://github.com/samtools/samtools>), and data was graphed  
150 using GraphPad (v6.01).

#### 151 *Phylogenetic analysis*

152 Nucleotide sequences for ORF1, ORF2 and ORF3 from each norovirus strain and closely related  
153 GenBank reference sequences (MK753033, KJ407074, MT409884, MH218671, KC576912,  
154 MK762635, KX158279, MT731279, MN996298, KU757046) were aligned with MUSCLE  
155 using MEGA (v10.1.8) (Tamura, et al. 2013). Maximum Likelihood phylogenetic trees based on  
156 the Tamura-Nei model were constructed and visualized in MEGA using the aligned sequences  
157 and 1000 bootstrap replicates.



158 *Single nucleotide variant (SNV) analysis*

159 Single nucleotide variants were identified for each norovirus sample with Breseq (v0.35.5)  
160 (Deatherage and Barrick. 2014) using the mutation prediction pipeline and default parameters.  
161 Variants were identified using the norovirus Illumina reads for each sample and highly similar  
162 complete genome GenBank references. GenBank accessions used were MK753033, KJ407074,  
163 MT409884, MH218671, KC576912, MK762635, KX158279, MT731279, MN996298, and  
164 KU757046.

165 *Recombination analysis*

166 Whole genome assemblies for the 39 isolates and closely related GenBank reference sequences  
167 (MK753033, KJ407074, MT409884, MH218671, KC576912, MK762635, KX158279,  
168 MT731279, MN996298, KU757046) were aligned with MUSCLE using MEGA (v10.1.8)  
169 (Tamura, et al. 2013). Recombination breakpoints and identification of potential parental  
170 sequences were performed using the Recombination Detection Program (RDP4) (v4.101)  
171 (Martin, et al. 2015) using seven recombination methodologies: RDP, GENECONV, MaxChi,  
172 Bootscan, Chimera, SiScan and 3Seq. A sliding window of 200-bp and a step size of 20 bp, and a  
173 multiple-comparison corrected  $p < 0.05$  were used. Graphs were created using Simplot within  
174 RDP4.

175 *Data availability*

176 The complete *de novo* genome sequences of the 39 norovirus isolates used in this study have  
177 been uploaded to GenBank under accession numbers: MW661246 to MW661284. All SRAs are  
178 available in GenBank under BioProject ID PRJNA713985.

## 179 **Results**

### 180 **Amplicon Production**

181 To examine whether full-length amplicons could be generated for a variety of GII samples, we  
182 employed the primers that encompass 5'UTR to 3'UT on 57 GII positive samples (44 isolated in  
183 2019 and the remaining 13 were archived samples isolated since 2011). Full-length amplicons  
184 were obtained from 39 samples, and multiple efforts for the remaining 18 samples failed to  
185 generate any full-length amplicons. Thus, we conducted conventional RT-PCR to obtain partial  
186 amplicons for dual typing of these samples by Sanger sequencing. Four out of 18 samples failed  
187 to generate any RT-PCR product for dual typing. The full-length amplicons obtained from all 39  
188 samples were subjected to both Illumina and Nanopore sequencing as depicted in Figure 1. The  
189 data obtained from both approaches were used to assemble the full-genomes and for further  
190 sequence analysis.

191 As shown in Figure 2 and Supplementary Table 1, GII.P16 (63%) was the dominant polymerase  
192 type followed by GII.P12 (11%), GII.P7 (10%), and GII.P31 (8%). As expected, GII.4 (44%)  
193 was the most prevalent genotype, followed by GII.1 (17%), GII.3 (13%), GII.2 (12%), and GII.6  
194 (8%). The dominant GII.P16 was mostly associated with GII.4, making GII.4 [P16] the most  
195 prevalent strain (30%), however, it was also associated with GII.1, and GII.2 (Supplementary  
196 Table 1).

### 197 **Analysis of the Assay Sensitivity**

198 To determine the lowest viral genome copy number that would produce full-length amplicons,  
199 we made serial dilutions for four representative samples; BMH16-77, BMH18-86, BMH19-95,

200 and BMH19-96. The full-length amplicons generated from the highest dilution (lowest viral  
201 load) was subjected to Illumina sequencing to ensure the full-genome sequence could still be  
202 obtained. As shown in Table 1, the lowest viral RNA titre that generated full-length sequence  
203 ranged from 1.7 to  $3.4 \times 10^2$  RNA copy number.

#### 204 **Comparison between Illumina and MinION Coverage**

205 To compare sequencing coverage along the full length of the norovirus genomes, representative  
206 samples from each genotype identified in this study were selected for coverage depth analysis.  
207 For each genotype, the Illumina and Nanopore reads were mapped to their corresponding  
208 consensus sequence and the sequencing depth at each nucleotide position was determined. As  
209 shown in Figure 3, the Illumina and Nanopore read data produced similar patterns of coverage  
210 depth across the length of the norovirus genomes. For the representative genotypes GII.1[P16],  
211 GII.4[P4], GII.4[P16] and GII.4[P31], the Nanopore data showed increased sequencing depth  
212 across ~2500 bp of ORF1 of the genome. A similar trend is also observed in the Illumina  
213 sequencing data, although not as pronounced. The Illumina and Nanopore data for GII.2[P16]  
214 showed increased depth of coverage across the first ~2500 bp of ORF1 and the last ~2500 bp  
215 corresponding to ORF2 and ORF3. Interestingly, the Nanopore data for GII.8[P8] had a large  
216 increase in depth across ~500 bp at the 5' end of the genome in contrast to the Illumina data,  
217 which showed consistent sequencing depth across the entire length of the genome (excluding the  
218 5' and 3' ends of the genome). Consistent sequencing depth coverage across the genome was  
219 observed for GII.3[P12], GII.3[P21], GII.6[P7], and GII.17[P17] for both sequencing  
220 technologies.

221 Overall, the Illumina data typically lacked coverage at both the 5' and 3' end of the norovirus  
222 genomes (Figure 3) resulting in incomplete genome assemblies and only partial coding sequence  
223 data for ORF1 (data not shown). In contrast, the Nanopore reads yielded full-length sequences,  
224 which covered both the 5' and 3' ends of the norovirus genome. Additionally, using the  
225 Nanopore reads it was possible to obtain complete and/or partially complete sequences of the 5'  
226 and 3' UTR regions.

### 227 **Phylogenetic Analysis**

228 Phylogenetic analysis of the 39 Canadian *de novo* assembled norovirus strains from this study  
229 was performed for ORF1, ORF2, and ORF3 (Figure 4A). The phylogenetic tree for ORF1 is  
230 based on the nucleotide sequence of the 6 non-structural genes p48, NTPase, p22, VPg, Pro, and  
231 RdRP. Each ORF from the 39 norovirus strains and highly similar reference strains for each  
232 genotype were aligned, and Maximum Likelihood trees were constructed. For ORF1, the 39  
233 norovirus samples belong to 8 different polymerase types (GII.P4, GII.P7, GII.P8, GII.P12,  
234 GII.P16, GII.P17, GII.P21, GII.P31; Supplementary Table 1). As shown in Figure 4, the majority  
235 of the samples (24/39) belong to polymerase type GII.P16 and cluster together (BMH11-021,  
236 BMH14-054, BMH16-074, BMH18-085, BMH19-090, BMH19-092, BMH19-093, BMH19-  
237 094, BMH19-096, BMH19-097, BMH19-108, BMH19-109, BMH19-110, BMH19-111,  
238 BMH19-112, BMH19-113, BMH19-115, BMH19-117, BMH19-125, BMH19-127, BMH19-  
239 128, BMH19-129, BMH19-132, BMH19-137). These strains also cluster closely with the NCBI  
240 reference strains for the GII.P16 genotype (GenBank accession MK753033, KJ407074, and  
241 MK762635). Furthermore, strains BMH19-108, BMH19-109, BMH19-110, BMH19-111,  
242 BMH19-112, and BMH19-113 are highly similar and isolated from the same outbreak. Strains

243 BMH13-039, BMH15-059, BMH15-063 and BMH19-130, which belong to GII.P31, clustered  
244 together along with the reference strain (GenBank accession KX158279). The GII.P12 sequences  
245 (BMH16-077, BMH19-100 and BMH19-120) and reference (GenBank accession MT409884)  
246 clustered together. The GII.P7 strains (BMH14-056, BMH19-118, BMH19-119, BMH19-145)  
247 and reference strain (GenBank accession MT731279) clustered, although strains BMH14-056  
248 and BMH19-145 show less similarity to strains BMH19-118, BMH19-119. The remaining  
249 strains BMH12-030 (GII.P4), BMH18-086 (GII.P8), BMH15-067 (GII.P17) and BMH19-095  
250 (GII.P21) all clustered with their corresponding reference strains (GenBank accession  
251 KC576912, MN996298, KU757046 and MH218671 respectively).

252 The phylogenetic tree for ORF2 (Figure 4B) was constructed using the aligned nucleotide  
253 sequences corresponding to the shell, P1 and P2 major capsid domains. The norovirus strains  
254 belong to the 7 genotypes GII.1, GII.2, GII.3, GII.4, GII.6, GII.8 and GII.17 with the majority of  
255 the strains identified as GII.1 (8/39) and GII.4 (17/39). The GII.1 strains BMH19-096, BMH19-  
256 108, BMH19-109, BMH19-110, BMH19-111, BMH19-112, BMH19-113 and BMH19-115 were  
257 highly similar where BMH19-108, BMH19-109, BMH19-110, BMH19-111, BMH19-112 and  
258 BMH19-113 are all associated with the same norovirus outbreak (reference strain GenBank  
259 accession MK753033). The norovirus GII.4 strains, belonging to subtype Sydney 2012, BMH13-  
260 039, BMH15-059, BMH15-063, BMH16-074, BMH18-085, BMH19-090, BMH19-092,  
261 BMH19-093, BMH19-094, BMH19-097, BMH19-127, BMH19-128, BMH19-129, BMH19-  
262 130, BMH19-132, and BMH19-137 also clustered closely together along with the reference  
263 strains (GenBank accession MK762635 and KX158279). The remaining GII.4 strain (BMH12-  
264 030) belongs to subtype Den Haag 2006b, which shows less similarity to the GII.4 Sydney 2012  
265 strains. The GII.2 norovirus strains (BMH11-021, BMH14-054, BMH19-117 and BMH19-125)

266 clustered together (GenBank accession KJ407074). The ORF2 sequences for BMH16-077,  
267 BMH19-095, BMH19-100 and BMH19-120 GII.3 strains clustered with the reference sequence  
268 (GenBank accession MT409884), although BMH19-095 showed greater genetic distance from  
269 the rest of the strains. For the GII.6 genotype, BMH19-118 and BMH19-119 are highly similar  
270 whereas BMH14-056 and BMH19-145 display greater genetic differences (GenBank accession  
271 MT731279). The remaining ORF2 genotypes GII.8 (BMH18-086) and GII.17 (BMH15-067)  
272 clustered with their respective references (GenBank accession MN996298 and KU757046).

273 For ORF3, the phylogenetic tree is similar to that observed for ORF2 with all 39 norovirus  
274 strains clustering with their respective genotypes GII.1, GII.2, GII.3, GII.4, GII.6, GII.8 and  
275 GII.17 (Figure 4C).

## 276 **Variant Analysis**

277 The structural domains of the capsid include an N-terminus, a highly conserved shell, and two  
278 protruding spike domains (P1 and hypervariable P2) (Smith and Smith. 2019, Debbink, et al.  
279 2012). The capsid is also an antigenic target for the host immune system. Consequently,  
280 norovirus mutations to these capsid structural proteins aid in host immune system evasion  
281 (Lindesmith, et al. 2013). To investigate potential ORF2 variations in the norovirus samples,  
282 single nucleotide variant (SNV) analysis was conducted for each strain using highly similar  
283 GenBank references (Figure 5, Supplementary Table 2). From Figure 5, the majority of the  
284 SNVs resulting in amino acid changes were observed in the P2 domain. This trend was observed  
285 for all of the genotypes in this study. For GII.1, the linked outbreak samples BMH19-108,  
286 BMH19-109, BMH19-110, BMH19-111, BMH19-112 and BMH19-113 all have changes in the  
287 P2 domain at T325M, H374Q and N293S relative to the reference strain (GenBank accession

288 MK753033). BMH19-117 and BMH19-125, samples from genotype GII.2, showed changes in  
289 the N-terminus (S24N), P1 (V256I), P2 (V319I, V335I, V373I), and P1 (V440I) (GenBank  
290 accession KJ407074). The majority of samples (17/39) in this study belong to the GII.4[P16]  
291 genotype (BMH16-074, BMH18-085, BMH19-090, BMH19-092, BMH19-093, BMH19-094,  
292 BMH19-097, BMH19-127, BMH19-128, BMH19-129, BMH19-132, BMH19-137), and with the  
293 exception of BMH19-137, contain a common V377A mutation in the P2 domain relative to the  
294 reference strain (GenBank accession MK762635). The norovirus GII.6 strains, BMH19-118,  
295 BMH19-119 and BMH19-145 all have a S174P change in the conserved shell domain, as well as  
296 a G354Q variation in the P2 domain of BMH19-118 and BMH19-119 (GenBank accession  
297 MT731279).

298 The norovirus RdRp (NS7) is the core enzyme for RNA replication. Its structure is highly  
299 similar to those of other positive-strand RNA viruses and can be described as a partially closed  
300 right hand, with fingers, thumb, and palm subdomains (Deval, et al. 2017). The fingers and palm  
301 domains interact to form a channel. Within this channel there are 7 conserved motifs named A  
302 through G, which interact with the template, the nascent RNA, and the NTPs for RNA synthesis  
303 and comprise the active site (Deval, et al. 2017). As shown in Figure 6, the majority of the SNVs  
304 resulting in amino acid changes in RdRP were observed in the Fingers and the Palm domains.  
305 Also, as previously mentioned, GII.P16 was the dominant polymerase type, associated with three  
306 capsid genotypes; GII.4, GII.2, and GII.1. Similar to what has been observed for the VP1 protein,  
307 the linked outbreak samples BMH19-108, BMH19-109, BMH19-110, BMH19-111, BMH19-112  
308 and BMH19-113 all have the same changes in the Finger and Palm domains at T1294S, S1401T,  
309 V1446A relative to the reference strain (GenBank accession MK753033) (Supplementary Table  
310 3). The K1646R substitution is one of the few amino acid changes in the Thumb domain that was

311 observed in the majority of the GII.4[P16] isolates, while the S1401T change in the Palm domain  
312 was observed for most GII.P16 isolates regardless of the capsid genotype (Figure 6 and  
313 Supplementary Table 3).

#### 314 **Recombination**

315 Noroviruses are prone to recombine at the boundary of ORF1/ORF2 (Parra. 2019). To  
316 investigate recombination events, the 39 whole genome norovirus sequences were analyzed  
317 using RDP4 (Figure 6 and Supplementary Table 3). As shown in Figure 7a, BMH16-074 (GII.4  
318 Sydney 2012[P16] was identified as being a recombinant strain. The major parent has the  
319 genotype GII.1[P16] (GenBank accession MK753033) and minor parent is GII.4 Sydney  
320 2012[P31] (GenBank accession KX158279). Thus, a recombinant event at the ORF1/ORF2  
321 boundary resulted in BMH16-074 obtaining the ORF2/3 region for GII.4 Sydney 2012.  
322 Additionally, the strains BMH18-085, BMH19-090, BMH19-092, BMH19-093, BMH19-094,  
323 BMH19-097, BMH19-127, BMH19-128, BMH19-129, BMH19-132 and BMH19-137 show  
324 evidence of this same recombination event (Supplementary Table 4).

325 BMH16-077, genotype GII.3[P12], shows evidence of a major recombination event at the  
326 ORF1/ORF2 boundary (Figure 7b). GenBank reference strain MH218671, which has the  
327 genotype GII.3[P21], was identified as the minor parent, and reference strain KX158279 with  
328 genotype GII.4 Sydney 2012 [P31], the major parent. The recombination event resulted in  
329 BMH16-077 exchanging the GII.4 Sydney 2012 ORF2 region for the GII.3 sequence. BMH19-  
330 100 and BMH19-120 also show evidence of the same recombination event (Supplementary  
331 Table 4).



332 Evidence of a recombination event at the ORF1/ORF2 boundary is also observed for BMH19-  
333 125 (Figure 7c). For this isolate, BMH19-125, which has the genotype GII.2[P16], underwent a  
334 recombination event with the GenBank reference strain MK753033 (GII.1[P16]). The major  
335 parent identified was GenBank reference isolate KJ407074 (GII.2[P16]). This event resulted in  
336 the recombination of the ORF1 GII.P16 between BMH19-125 and GenBank strain MK753033.  
337 Evidence of this same recombination event is also observed in BMH19-117 (Supplementary  
338 Table 4).

## 339 **Discussion**

340 The approach implemented by Parra and colleagues for full-length amplicon generation of GII  
341 samples has the potential to revolutionize the genome analysis of noroviruses. Herein, we  
342 applied this approach on 57 norovirus GII positive samples and obtained full-length amplicons  
343 for 39 samples (>67%). We performed Sanger sequencing to determine the genotype of the  
344 remaining samples. The failure of these samples to generate full-amplicons could be explained  
345 by the presence of RT-PCR inhibitors, as the viral titre for these samples are above the limit of  
346 the assay. For future applications, diluting the samples could potentially reduce the effect of RT-  
347 PCR inhibitors and aid in obtaining full-length amplicons (Nasheri, et al. 2020). We have also  
348 determined the lowest viral RNA load that would render full-genomic amplicons for four  
349 representative samples, and demonstrated that 170 to 346 genome copies would be enough for  
350 WGS using this technique. This is promising as the level of natural contamination for certain  
351 high-risk foods such as oysters is within or even higher than this range (Le Guyader, et al. 2009).  
352 Therefore, this approach has the potential to be employed for WGS analysis of naturally  
353 contaminated food products in the absence of an enrichment strategy.

354 Coverage analysis of representative norovirus genomes demonstrated the utility of combining  
355 long read Nanopore and short read Illumina sequencing data to obtain full-length *de novo*  
356 norovirus genomes. Using an approach that consisted only of Illumina sequencing, we often  
357 obtained incomplete genome assemblies. Indeed, decreased sequencing coverage at the 5' and 3'  
358 end of the norovirus sequence is observed for the Illumina data (Figure 3), resulting in partial  
359 assembly for ORF1, and less frequently, ORF3 (data not shown). By using a hybrid genome  
360 assembly approach, we were able to obtain highly accurate complete norovirus genomic  
361 sequences by first extracting full-length Nanopore sequence reads followed by error correction  
362 using a combination of both long and short read sequencing data. Differences in coverage depth  
363 along the genomes that are observed in some of the samples (Figure 3) are likely the result of  
364 incomplete cDNA synthesis (partial genome length amplicons), or the presence of subgenomic  
365 sequences.

366 In recent years, the emergence and spread of RdRp/capsid recombinant noroviruses have been  
367 reported around the world. In the United States, a new recombinant GII.4 Sydney emerged in  
368 2015 (GII.4 Sydney[P16]) and replaced the 2012 variant (GII.4 Sydney[P31], formerly GII.Pe-  
369 GII.4 Sydney), which was the dominant strain for several years throughout the world (Barclay, et  
370 al. 2019). In Alberta, Canada, GII.4 Sydney[P16] was predominant in 2015–2016 and 2017–  
371 2018 (Hasing, et al. 2019), GII.2[P16] was predominant in 2016–2017 (Hasing, et al. 2019), and  
372 GII.12[P16] emerged in 2018–2019 and caused 10% of outbreaks and 17% of sporadic cases  
373 (Pabbaraju, et al. 2019). Herein, GII.4 Sydney[P16] made up 13 out of 30 (43.3%) samples since  
374 2016 and thus was the predominant strain in 2016–2019, consistent with what has been reported  
375 before (Hasing, et al. 2019). Although, a combination of other genotypes such as GII.3[P12],  
376 GII.1[P16], and GII.6[P7] were co-circulating at this time, GII.4 isolates were only associated

377 with GII.P16 (Supplementary Table 1). It was also interesting to detect the GII.17[P17] strain  
378 that caused several outbreaks in multiple countries during 2014 and 2015 (Matsushima, et al.  
379 2019, van Beek, et al. 2018) from a sample that was isolated in 2015 (Supplementary Table 1).

380 Even though GII.P16 has recently re-emerged as the dominant polymerase type, the oldest  
381 isolate in this study BMH11-021 also has P16, but it does not cluster with the recent isolates,  
382 instead it shows homology to older P16 isolates from 2011 (Figure 4 A). On the other hand,  
383 more recent GII.4 isolates from 2019 still show high homology to the older isolates from 2013,  
384 2014, and 2015. This observation, together with the fact that GII.4 has continued to be the  
385 dominant genotype for more than three decades, indicates that despite some sequence plasticity,  
386 the GII.4 capsid is evolutionarily conserved due to some fitness advantages. Our results also  
387 demonstrate that samples BMH19-108 to BMH19-115 resulting from the GII.1[P16] outbreak  
388 are highly homologous across all three ORFs (Figure 4).

389 The P2 subdomain of the VP1 protein interacts with potential norovirus carbohydrate receptors  
390 and contains 6 antigenic epitopes (Debbink, et al. 2012, Lindesmith, et al. 2013), therefore, it is  
391 not surprising to see that the majority of the non-synonymous SNVs are concentrated in this  
392 subdomain (Figure 5). The GII.4 Sydney[P16] isolates in this study, all contain the V377A  
393 change in the antigenic sites in the P2 subdomain (Supplementary Table 2) already described  
394 among GII.4 Sydney[P16] isolates in the U.S. (Cannon, et al. 2017), which is absent in GII.4  
395 Sydney[P31] isolates. In addition, BMH19-090 contains the M333V change in the epitope C of  
396 the P2 subdomain that was reported in GII.4 Sydney[P16] isolates in multiple studies (Cannon, et  
397 al. 2017, Ruis, et al. 2020). It has been suggested that these substitutions influence viral fitness  
398 by altering antigenicity, increasing transmissibility, receptor binding, or particle stability (Ruis,  
399 et al. 2020). Outbreak samples BMH19-127 to BMH19-132 have a S470T within the P1

400 subdomain that has not been reported before. GII.2[P16] strains have been reported in the last  
401 decade, and the S24N, and V335I substitutions observed in the isolates in this study have been  
402 detected before (Tohma, et al. 2017). However, V256I, V319I, V373I, and V440I substitutions  
403 were only observed in the samples from this study (Supplementary Table 2), and they are  
404 considered biochemically conserved substitutions.

405 The re-emerging P16 isolated in this study were associated with three capsid genotypes; GII.4,  
406 GII.2, and GII.1 (Figure 6). The outbreak associated GII.P16 (GII.1) isolates all have the same  
407 three substitutions T1294S, S1401T, and V1446A (supplementary Table 3). However, the  
408 S1401T substitution in the Palm domain was also observed in GII.P16 (GII.2) and GII.P16  
409 (GII.4) isolates. Three out of four sporadic P31 isolates in this study, which are associated with  
410 GII.4 Sydney capsid, had R1236K substitution in the Fingers domain. The GII.P12 isolates all  
411 have the V1521I substitution, and all the GII.P7 isolates have the I1519V substitution within the  
412 Palm domain, however, none of these substitutions falls within the conserved motifs or the active  
413 sites, and they are all considered biochemically conserved substitutions, thus their significance is  
414 not known.

415 In conclusion, using the full-length amplicons is an efficient and sensitive method for norovirus  
416 WGS analysis. Also, our results are consistent with other reports regarding the predominance of  
417 GII.4[P16] Sydney replacing the previous GII.4[P31] Sydney, indicating the enhanced fitness of  
418 the GII.4 Sydney capsid. Continued norovirus genomic surveillance will help in the  
419 understanding of norovirus evolutionary mechanisms and the identification of emerging variants,  
420 which ultimately aid in designing future norovirus vaccines and antivirals.

## 421 **Acknowledgements**

422 The authors would like to thank Dr. Brent Dixon and Dr. Ana Pilar from the Bureau of Microbial  
423 Hazards for kindly reviewing the manuscript and providing insightful comments. This study is  
424 financially supported by the Bureau of Microbial Hazards, Health Canada.

425

426 **Figure Captions**

427 **Figure 1. Schematic representation of experimental approach for norovirus *de novo* whole**  
428 **genome sequencing, assembly and bioinformatics analysis.** Norovirus viral RNA was  
429 extracted from stool samples followed by full-length cDNA amplification. cDNA was sequenced  
430 on an Illumina MiSeq platform and an Oxford Nanopore MinION device to obtain high quality  
431 short read and long read data, respectively. Illumina and Nanopore reads were processed to  
432 remove adaptor and barcode sequences followed by quality trimming of Illumina reads and  
433 length filtering of Nanopore reads. A hybrid approach using both Illumina and Nanopore reads  
434 was used to produce *de novo* full-length norovirus genomes. Genome annotation and  
435 downstream analyses were performed using the norovirus assemblies.

436 **Figure 2. Norovirus genotypes identified in this study.** Norovirus Genotyping Tool v2.0 was  
437 used to determine the polymerase type (A) and the capsid/ORF2 genotype (B) of all the samples  
438 sequenced (by Sanger or next-generation sequencing) in this study.

439 **Figure 3. Coverage profiles of representative norovirus genotypes using Illumina and**  
440 **Nanopore read data.** Reads were mapped to the *de novo* consensus sequence for each genotype  
441 and read type. Depth across the genome at each nucleotide position for Illumina (blue) and  
442 Nanopore (black) is shown. Schematic representation of the norovirus genome for each ORF is  
443 illustrated below each column of graphs.

444 **Figure 4. Phylogenetic trees of Canadian norovirus GII ORF1, ORF2 and ORF3 nucleotide**  
445 **sequences obtained from this study.** Maximum likelihood trees were constructed using MEGA  
446 (v10.1.8) and 1000 bootstrap replicates. The scale bars represent the phylogenetic distance  
447 expressed as nucleotide substitutions per site. Reference sequences were obtained from GenBank  
448 with accession numbers, genotype, year and country of isolation shown.

449 **Figure 5. Single nucleotide variation (SNV) analysis of norovirus ORF2 major capsid**  
450 **region.** Norovirus *de novo* assemblies were assessed for variants relative to highly similar NCBI  
451 reference sequences. Schematic representation of the norovirus ORF2 region is shown (upper  
452 left). SNVs that resulted in non-synonymous amino acid changes are shown (red lines) at  
453 corresponding amino acid positions in the N-terminal, Shell, P1, and P2 domains for each isolate.  
454 Isolates are grouped by capsid genotype. The GenBank reference Isolates (accession numbers in  
455 brackets) used were GII.1-2016-USA (MK753033), GII.2-2011-USA (KJ407074), GII.3-2015-  
456 USA (MT409884), GII.3-2015-UK (MH218671), GII.4-2011-USA (KC576912), GII.4-2017-  
457 USA (MK762635), GII.4-2015-Canada (KX158279), GII.6-2018-USA (MT731279), GII.8-  
458 2018-China (MN996298), and GII.17-2016-China (KU757046).

459 **Figure 6. SNV analysis of norovirus RdRP (Polymerase) region.** Norovirus *de novo*  
460 assemblies were assessed for variants relative to highly similar NCBI reference sequences.  
461 Schematic representation of the norovirus RdRP region is shown (upper left). SNVs that resulted  
462 in non-synonymous amino acid changes are shown (red lines) at corresponding amino acid  
463 positions in the Fingers, Palm, and Thumb domains for each isolate. Isolates are grouped by  
464 polymerase type. The GenBank reference Isolates (accession numbers in brackets) used were  
465 GII.P4-2011-USA (KC576912), GII.P7-2018-USA (MT731279), GII.P8-2018-China  
466 (MN996298), GII.P12-2015-USA (MT409884), GII.P16-2016-USA (MK753033), GII.P16-  
467 2011-USA (KJ407074), GII.P16-2017-USA (MK762635), GII.17-2016-China (KU757046),  
468 GII.P21-2015-UK (MH218671), and GII.P31-2015-Canada (KX158279).

469 **Figure 7. Recombination analysis of norovirus strains used in this study.** Simplots were  
470 constructed using RDP4 (v4.101) by comparison of the complete *de novo* norovirus genomes to  
471 the reference strains using a slide window width of 200 bp and step size of 20 bp. (A) Percentage

472 similarity of recombinant BMH16-074 to parental reference strains (Genbank accession  
473 MK753033 and KX158279). (B) Percentage similarity of recombinant BMH16-077 to parental  
474 reference strains (Genbank accession KX158279 and MH218671). (C) Percentage similarity of  
475 recombinant BMH19-125 to parental reference strains (Genbank accession KJ407074 and  
476 MK753033). Schematic representation of the norovirus genome is shown above the graph.

477

478

479



480

## References

- 481 Barclay, L., Cannon, J. L., Wikswo, M. E., Phillips, A. R., Browne, H., Montmayeur, A. M.,  
482 Tatusov, R. L., Burke, R. M., Hall, A. J. and Vinje, J. 2019. Emerging Novel GII.P16  
483 Noroviruses Associated with Multiple Capsid Genotypes. *Viruses* 11, 10.3390/v11060535.
- 484 Bartsch, S. M., Lopman, B. A., Ozawa, S., Hall, A. J. and Lee, B. Y. 2016. Global Economic  
485 Burden of Norovirus Gastroenteritis. *PLoS One* 11, e0151219.
- 486 Bull, R. A., Adikari, T. N., Ferguson, J. M., Hammond, J. M., Stevanovski, I., Beukers, A. G.,  
487 Naing, Z., Yeang, M., Verich, A., Gamaarachchi, H., Kim, K. W., Luciani, F., Stelzer-Braid, S.,  
488 Eden, J. S., Rawlinson, W. D., van Hal, S. J. and Deveson, I. W. 2020. Analytical validity of  
489 nanopore sequencing for rapid SARS-CoV-2 genome analysis. *Nat. Commun.* 11, 6272-020-  
490 20075-6.
- 491 Cannon, J. L., Baker, M., Barclay, L. and Vinje, J. 2019. Impact of long-term storage of clinical  
492 samples collected from 1996 to 2017 on RT-PCR detection of norovirus. *J. Virol. Methods* 267,  
493 35-41.
- 494 Cannon, J. L., Barclay, L., Collins, N. R., Wikswo, M. E., Castro, C. J., Magana, L. C.,  
495 Gregoricus, N., Marine, R. L., Chhabra, P. and Vinje, J. 2017. Genetic and Epidemiologic  
496 Trends of Norovirus Outbreaks in the United States from 2013 to 2016 Demonstrated Emergence  
497 of Novel GII.4 Recombinant Viruses. *J. Clin. Microbiol.* 55, 2208-2221.
- 498 Cates, J. E., Vinje, J., Parashar, U. and Hall, A. J. 2020. Recent advances in human norovirus  
499 research and implications for candidate vaccines. *Expert Rev. Vaccines* 19, 539-548.

500 Chen, S., Zhou, Y., Chen, Y. and Gu, J. 2018. fastp: an ultra-fast all-in-one FASTQ  
501 preprocessor. *Bioinformatics* 34, i884-i890.

502 Chhabra, P., de Graaf, M., Parra, G. I., Chan, M. C., Green, K., Martella, V., Wang, Q., White,  
503 P. A., Katayama, K., Vennema, H., Koopmans, M. P. G. and Vinje, J. 2019. Updated  
504 classification of norovirus genogroups and genotypes. *J. Gen. Virol.* 100, 1393-1406.

505 Cotten, M., Petrova, V., Phan, M. V., Rabaa, M. A., Watson, S. J., Ong, S. H., Kellam, P. and  
506 Baker, S. 2014. Deep sequencing of norovirus genomes defines evolutionary patterns in an urban  
507 tropical setting. *J. Virol.* 88, 11056-11069.

508 De Coster, W., D'Hert, S., Schultz, D. T., Cruys, M. and Van Broeckhoven, C. 2018. NanoPack:  
509 visualizing and processing long-read sequencing data. *Bioinformatics* 34, 2666-2669.

510 de Graaf, M., van Beek, J. and Koopmans, M. P. 2016. Human norovirus transmission and  
511 evolution in a changing world. *Nat. Rev. Microbiol.* 7, 421-433

512 Deatherage, D. E. and Barrick, J. E. 2014. Identification of mutations in laboratory-evolved  
513 microbes from next-generation sequencing data using breseq. *Methods Mol. Biol.* 1151, 165-  
514 188.

515 Debbink, K., Donaldson, E. F., Lindesmith, L. C. and Baric, R. S. 2012. Genetic mapping of a  
516 highly variable norovirus GII.4 blockade epitope: potential role in escape from human herd  
517 immunity. *J. Virol.* 86, 1214-1226.

- 518 Deval, J., Jin, Z., Chuang, Y. C., & Kao, C. C. 2017. Structure(s), function(s), and inhibition of  
519 the RNA-dependent RNA polymerase of noroviruses. *Virus research*, 234, 21–33.  
520 <https://doi.org/10.1016/j.virusres.2016.12.018>
- 521 Green, K. Y. 2013. *Caliciviridae: The Noroviruses*. In: Knipe, D. M. and Howley, P. M. (Eds.),  
522 *Fields Virology*. Lippincott Williams & Wilkins, pp. 948.
- 523 Hasing, M. E., Lee, B. E., Qiu, Y., Xia, M., Pabbaraju, K., Wong, A., Tipples, G., Jiang, X. and  
524 Pang, X. L. 2019. Changes in norovirus genotype diversity in gastroenteritis outbreaks in  
525 Alberta, Canada: 2012-2018. *BMC Infect. Dis.* 19, 177-019-3792-y.
- 526 Hosomichi, K., Mitsunaga, S., Nagasaki, H. and Inoue, I. 2014. A Bead-based Normalization for  
527 Uniform Sequencing depth (BeNUS) protocol for multi-samples sequencing exemplified by  
528 HLA-B. *BMC Genomics* 15, 645-2164-15-645.
- 529 Katayama, K., Shirato-Horikoshi, H., Kojima, S., Kageyama, T., Oka, T., Hoshino, F., Fukushi,  
530 S., Shinohara, M., Uchida, K., Suzuki, Y., Gojobori, T. and Takeda, N. 2002. Phylogenetic  
531 analysis of the complete genome of 18 Norwalk-like viruses. *Virology* 299, 225-239.
- 532 Kroneman, A., Vennema, H., Deforche, K., v d Avoort, H., Penaranda, S., Oberste, M. S., Vinje,  
533 J. and Koopmans, M. 2011. An automated genotyping tool for enteroviruses and noroviruses. *J.*  
534 *Clin. Virol.* 51, 121-125.
- 535 Le Guyader, F. S., Parnaudeau, S., Schaeffer, J., Bosch, A., Loisy, F., Pommepuy, M. and  
536 Atmar, R. L. 2009. Detection and quantification of noroviruses in shellfish. *Appl. Environ.*  
537 *Microbiol.* 75, 618-624.

538 Lindesmith, L. C., Costantini, V., Swanstrom, J., Debbink, K., Donaldson, E. F., Vinje, J. and  
539 Baric, R. S. 2013. Emergence of a norovirus GII.4 strain correlates with changes in evolving  
540 blockade epitopes. *J. Virol.* 87, 2803-2813.

541 Martin, D. P., Murrell, B., Golden, M., Khoosal, A. and Muhire, B. 2015. RDP4: Detection and  
542 analysis of recombination patterns in virus genomes . *Virus evolution.*

543 Matsushima, Y., Mizukoshi, F., Sakon, N., Doan, Y. H., Ueki, Y., Ogawa, Y., Motoya, T.,  
544 Tsukagoshi, H., Nakamura, N., Shigemoto, N., Yoshitomi, H., Okamoto-Nakagawa, R., Suzuki,  
545 R., Tsutsui, R., Terasoma, F., Takahashi, T., Sadamasu, K., Shimizu, H., Okabe, N., Nagasawa,  
546 K., Aso, J., Ishii, H., Kuroda, M., Ryo, A., Katayama, K. and Kimura, H. 2019. Evolutionary  
547 Analysis of the VP1 and RNA-Dependent RNA Polymerase Regions of Human Norovirus  
548 GII.P17-GII.17 in 2013-2017. *Front. Microbiol.* 10, 2189.

549 Menzel, P., Ng, K. L. and Krogh, A. 2016. Fast and sensitive taxonomic classification for  
550 metagenomics with Kaiju. *Nat. Commun.* 7, 11257.

551 Naseri, N., Harlow, J., Chen, A., Corneau, N. and Bidawid, S. 2020. Evaluation of Bead-Based  
552 Assays in the Isolation of Foodborne Viruses from Low-Moisture Foods . *J. Food Prot.* 83, 388-  
553 396.

554 Naseri, N., Petronella, N., Ronholm, J., Bidawid, S. and Corneau, N. 2017. Characterization of  
555 the Genomic Diversity of Norovirus in Linked Patients Using a Metagenomic Deep Sequencing  
556 Approach. *Front. Microbiol.* 8, 73.

557 Pabbaraju, K., Wong, A. A., Tipples, G. A. and Pang, X. L. 2019. Emergence of a Novel  
558 Recombinant Norovirus GII.P16-GII.12 Strain Causing Gastroenteritis, Alberta, Canada. *Emerg.*  
559 *Infect. Dis.* 25, 1556-1559.

560 Parra, G. I. 2019. Emergence of norovirus strains: A tale of two genes. *Virus Evol.* 5, vez048.

561 Parra, G. I. and Green, K. Y. 2015. Genome of Emerging Norovirus GII.17, United States, 2014.  
562 *Emerg. Infect. Dis.* 21, 1477-1479.

563 Parra, G. I., Squires, R. B., Karangwa, C. K., Johnson, J. A., Lepore, C. J., Sosnovtsev, S. V. and  
564 Green, K. Y. 2017. Static and Evolving Norovirus Genotypes: Implications for Epidemiology  
565 and Immunity. *PLoS Pathog.* 13, e1006136.

566 Petronella, N., Ronholm, J., Suresh, M., Harlow, J., Mykytczuk, O., Corneau, N., Bidawid, S.  
567 and Nasheri, N. 2018. Genetic characterization of norovirus GII.4 variants circulating in Canada  
568 using a metagenomic technique. *BMC Infect. Dis.* 18, 521-018-3419-8.

569 Ruis, C., Lindesmith, L. C., Mallory, M. L., Brewer-Jensen, P. D., Bryant, J. M., Costantini, V.,  
570 Monit, C., Vinje, J., Baric, R. S., Goldstein, R. A. and Breuer, J. 2020. Preadaptation of  
571 pandemic GII.4 noroviruses in unsampled virus reservoirs years before emergence. *Virus Evol.*  
572 6, veaa067.

573 Shean, R. C., Makhsous, N., Stoddard, G. D., Lin, M. J. and Greninger, A. L. 2019. VAPiD: a  
574 lightweight cross-platform viral annotation pipeline and identification tool to facilitate virus  
575 genome submissions to NCBI GenBank. *BMC Bioinformatics* 20, 48-019-2606-y.

576 Smith, H. Q. and Smith, T. J. 2019. The Dynamic Capsid Structures of the Noroviruses. *Viruses*  
577 11, 10.3390/v11030235.

578 Tamura, K., Stecher, G., Peterson, D., Filipski, A. and Kumar, S. 2013. MEGA6: Molecular  
579 Evolutionary Genetics Analysis version 6.0. *Mol. Biol. Evol.* 30, 2725-2729.

580 Teunis, P. F., Sukhrie, F. H., Vennema, H., Bogerman, J., Beersma, M. F. and Koopmans, M. P.  
581 2015. Shedding of norovirus in symptomatic and asymptomatic infections. *Epidemiol. Infect.*  
582 143, 1710-1717.

583 Tohma, K., Lepore, C. J., Ford-Siltz, L. A. and Parra, G. I. 2017. Phylogenetic Analyses Suggest  
584 that Factors Other Than the Capsid Protein Play a Role in the Epidemic Potential of GII.2  
585 Norovirus. *mSphere* 2, 10.1128/mSphereDirect.00187-17. eCollection 2017 May-Jun.

586 van Beek, J., de Graaf, M., Al-Hello, H., Allen, D. J., Ambert-Balay, K., Botteldoorn, N.,  
587 Brytting, M., Buesa, J., Cabrerizo, M., Chan, M., Cloak, F., Di Bartolo, I., Guix, S., Hewitt, J.,  
588 Iritani, N., Jin, M., Johne, R., Lederer, I., Mans, J., Martella, V., Maunula, L., McAllister, G.,  
589 Niendorf, S., Niesters, H. G., Podkolzin, A. T., Poljsak-Prijatelj, M., Rasmussen, L. D., Reuter,  
590 G., Tuite, G., Kroneman, A., Vennema, H., Koopmans, M. P. G. and NoroNet. 2018. Molecular  
591 surveillance of norovirus, 2005-16: an epidemiological analysis of data collected from the  
592 NoroNet network. *Lancet Infect. Dis.* 5, 545-553.

593 Viehweger, A., Krautwurst, S., Lamkiewicz, K., Madhugiri, R., Ziebuhr, J., Holzer, M. and  
594 Marz, M. 2019. Direct RNA nanopore sequencing of full-length coronavirus genomes provides  
595 novel insights into structural variants and enables modification analysis. *Genome Res.* 29, 1545-  
596 1554.

597 Walker, B. J., Abeel, T., Shea, T., Priest, M., Abouelliel, A., Sakthikumar, S., Cuomo, C. A.,  
598 Zeng, Q., Wortman, J., Young, S. K. and Earl, A. M. 2014. Pilon: an integrated tool for  
599 comprehensive microbial variant detection and genome assembly improvement. PLoS One 9,  
600 e112963.

601

602

603 **Table 1.** The lowest RNA copy number that generated full-length amplicons

| <b>Sample ID</b> | <b>RNA titre</b> | <b>Lowest titre generated amplicon</b> |
|------------------|------------------|----------------------------------------|
| BMH16-77         | 4.90E+06         | 2.70E+02                               |
| BMH18-86         | 2.20E+06         | 2.10E+02                               |
| BMH19-95         | 3.40E+06         | 1.70E+02                               |
| BMH19-96         | 3.50E+07         | 3.40E+02                               |

604

605



606 **Figure 1**

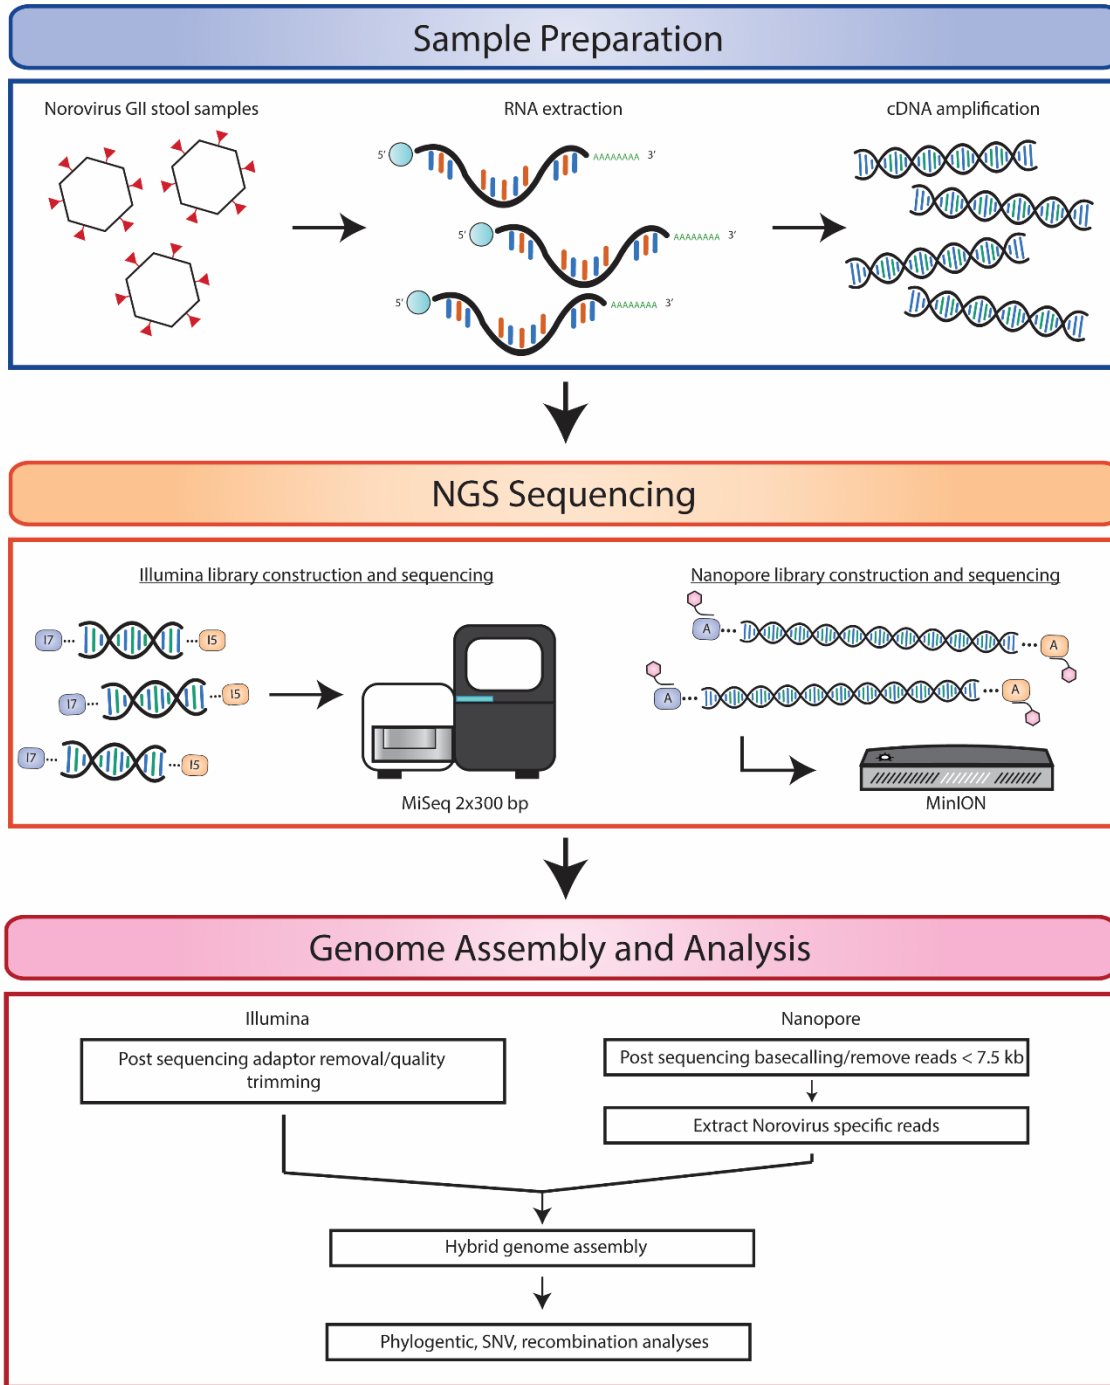

607

608

609 **Figure 2.**

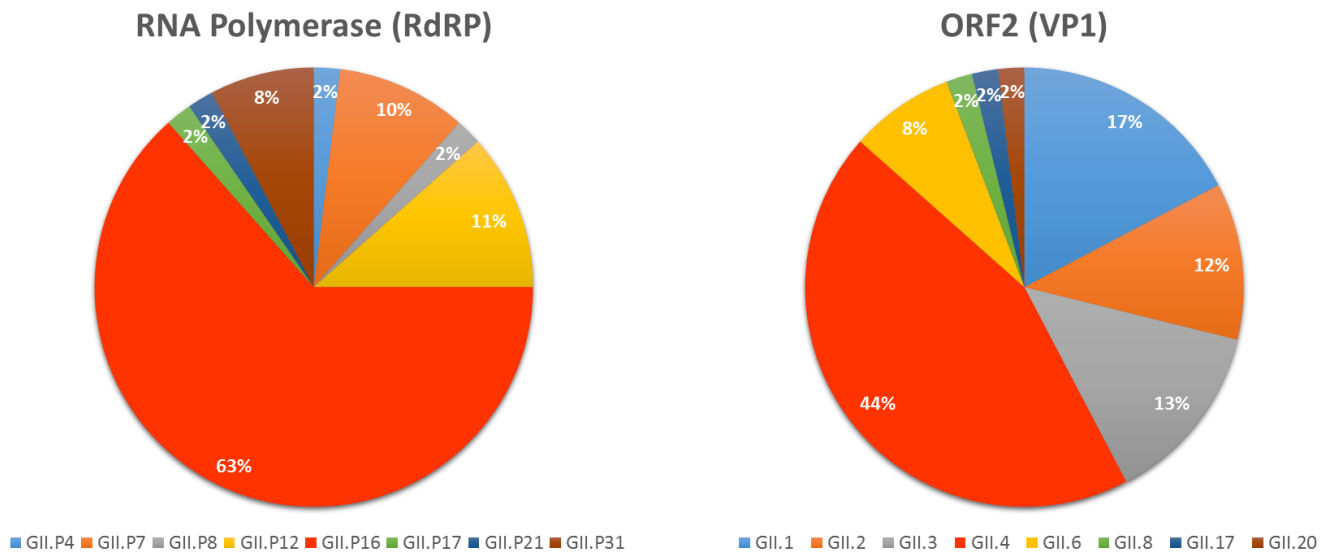

610

611

612 **Figure 3.**

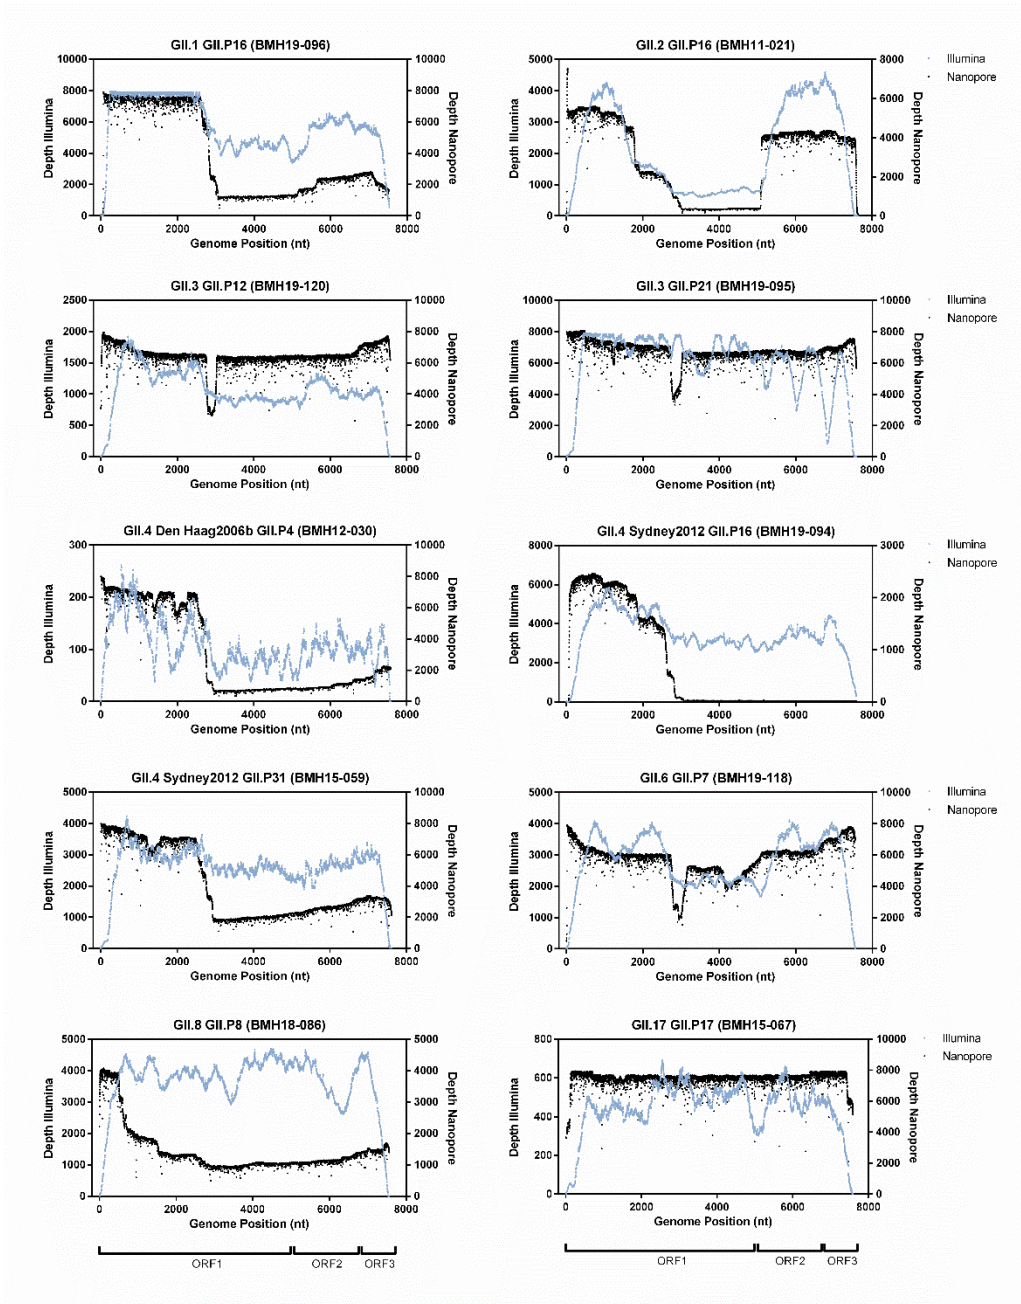

613

614

615 **Figure 4.**

616 A

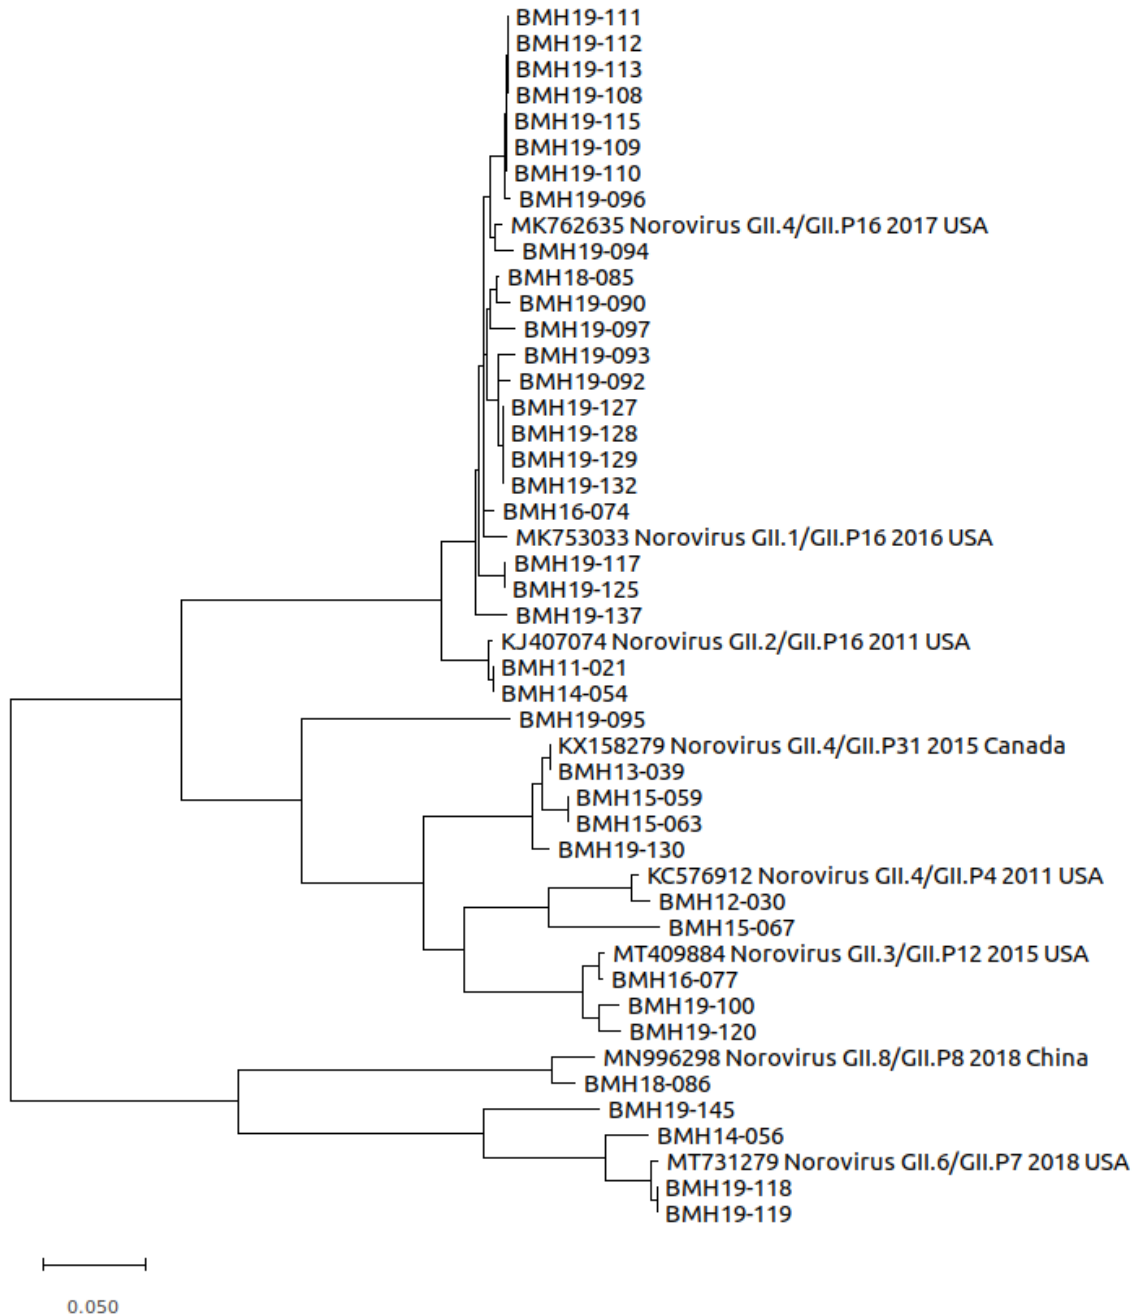

617

618

619

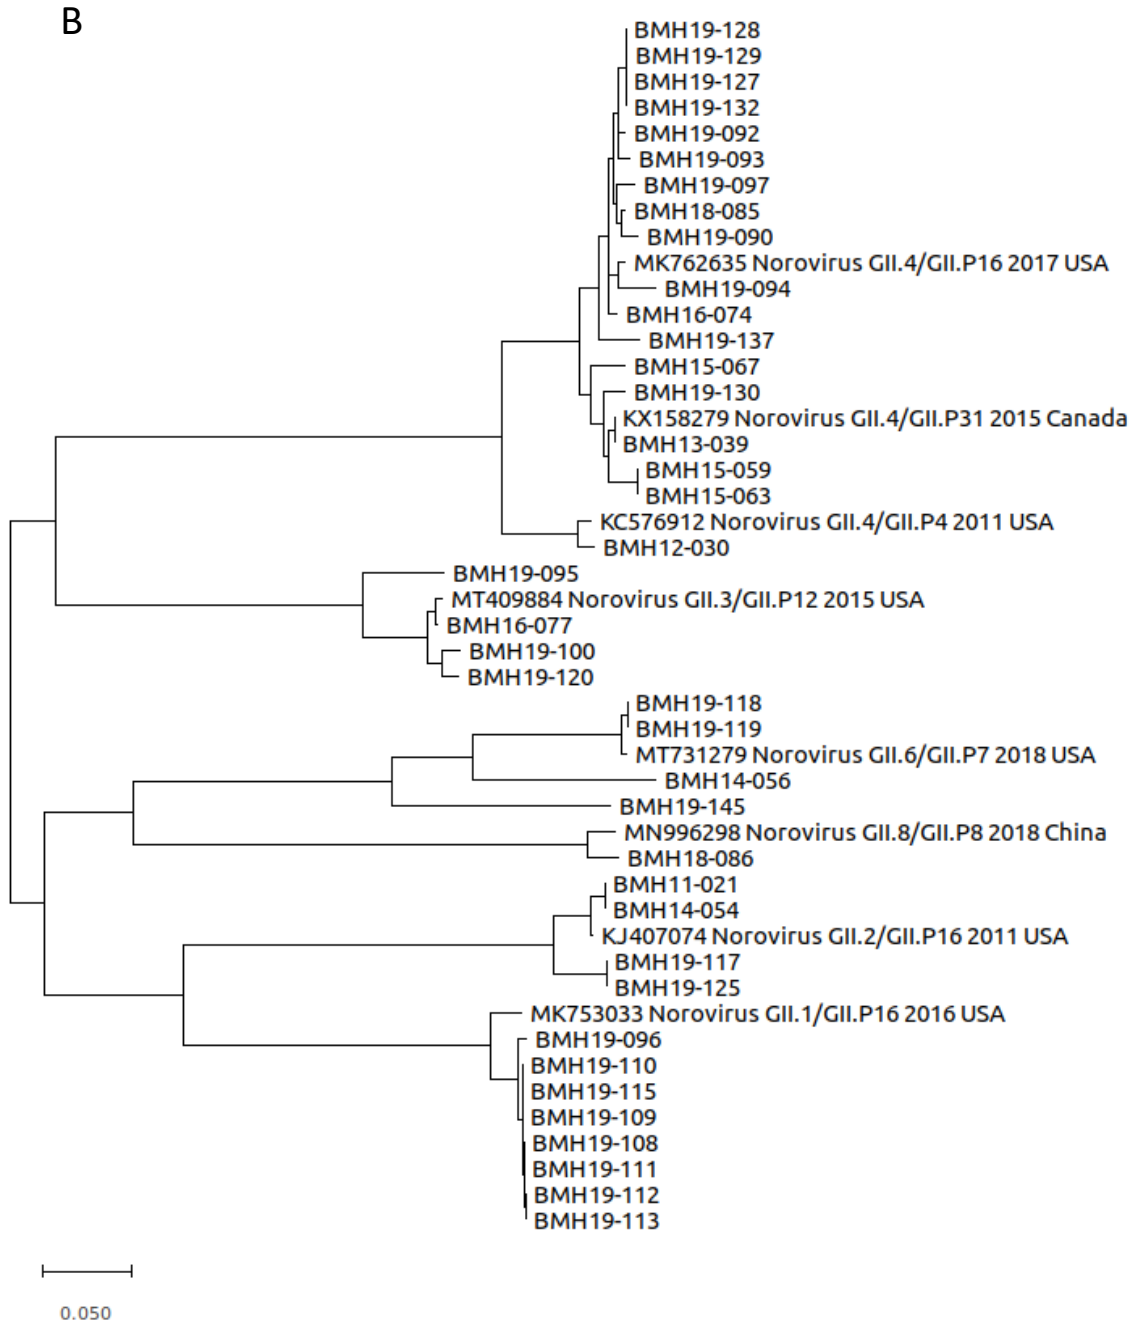

620

621

622

623

624

625

C

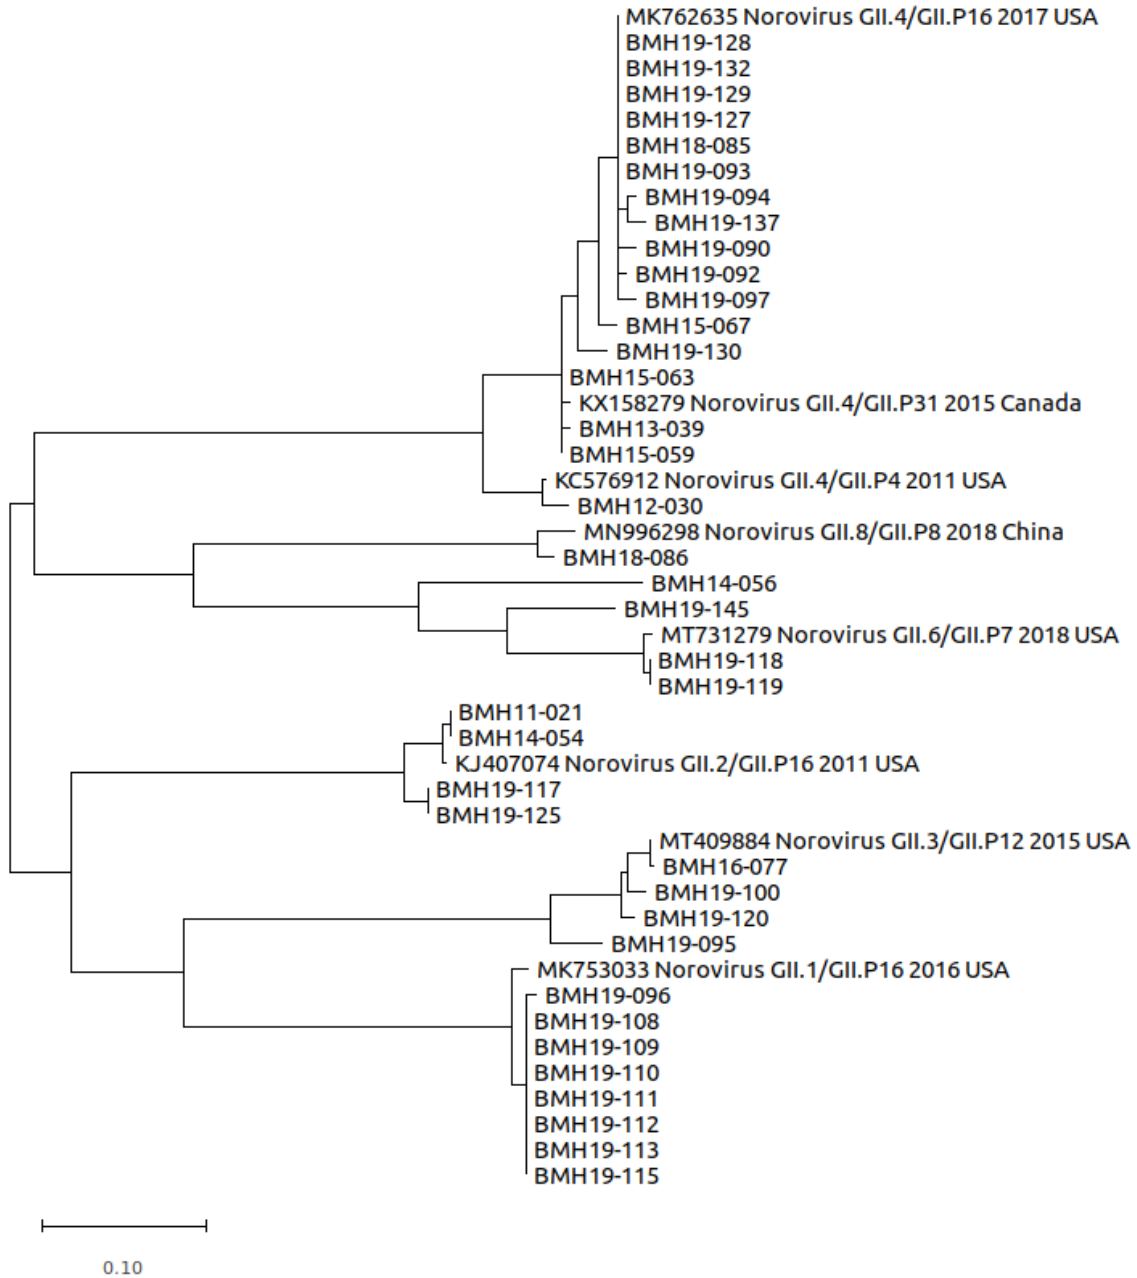

626

627

628

629

630 **Figure 5.**

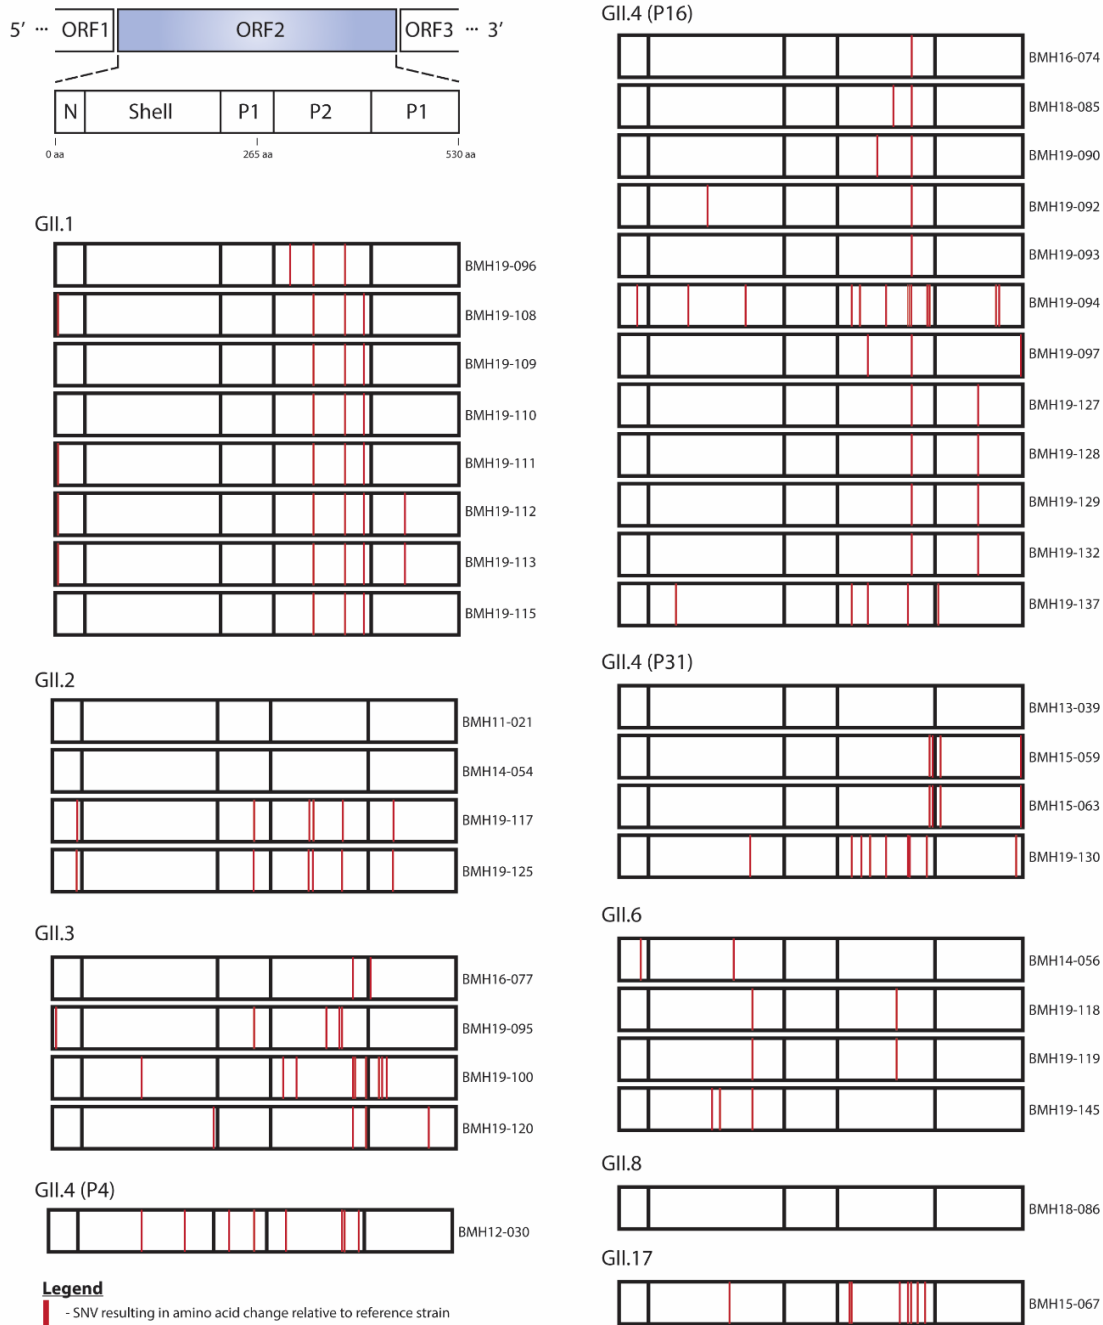

631

632

633

634

635 **Figure 6.**

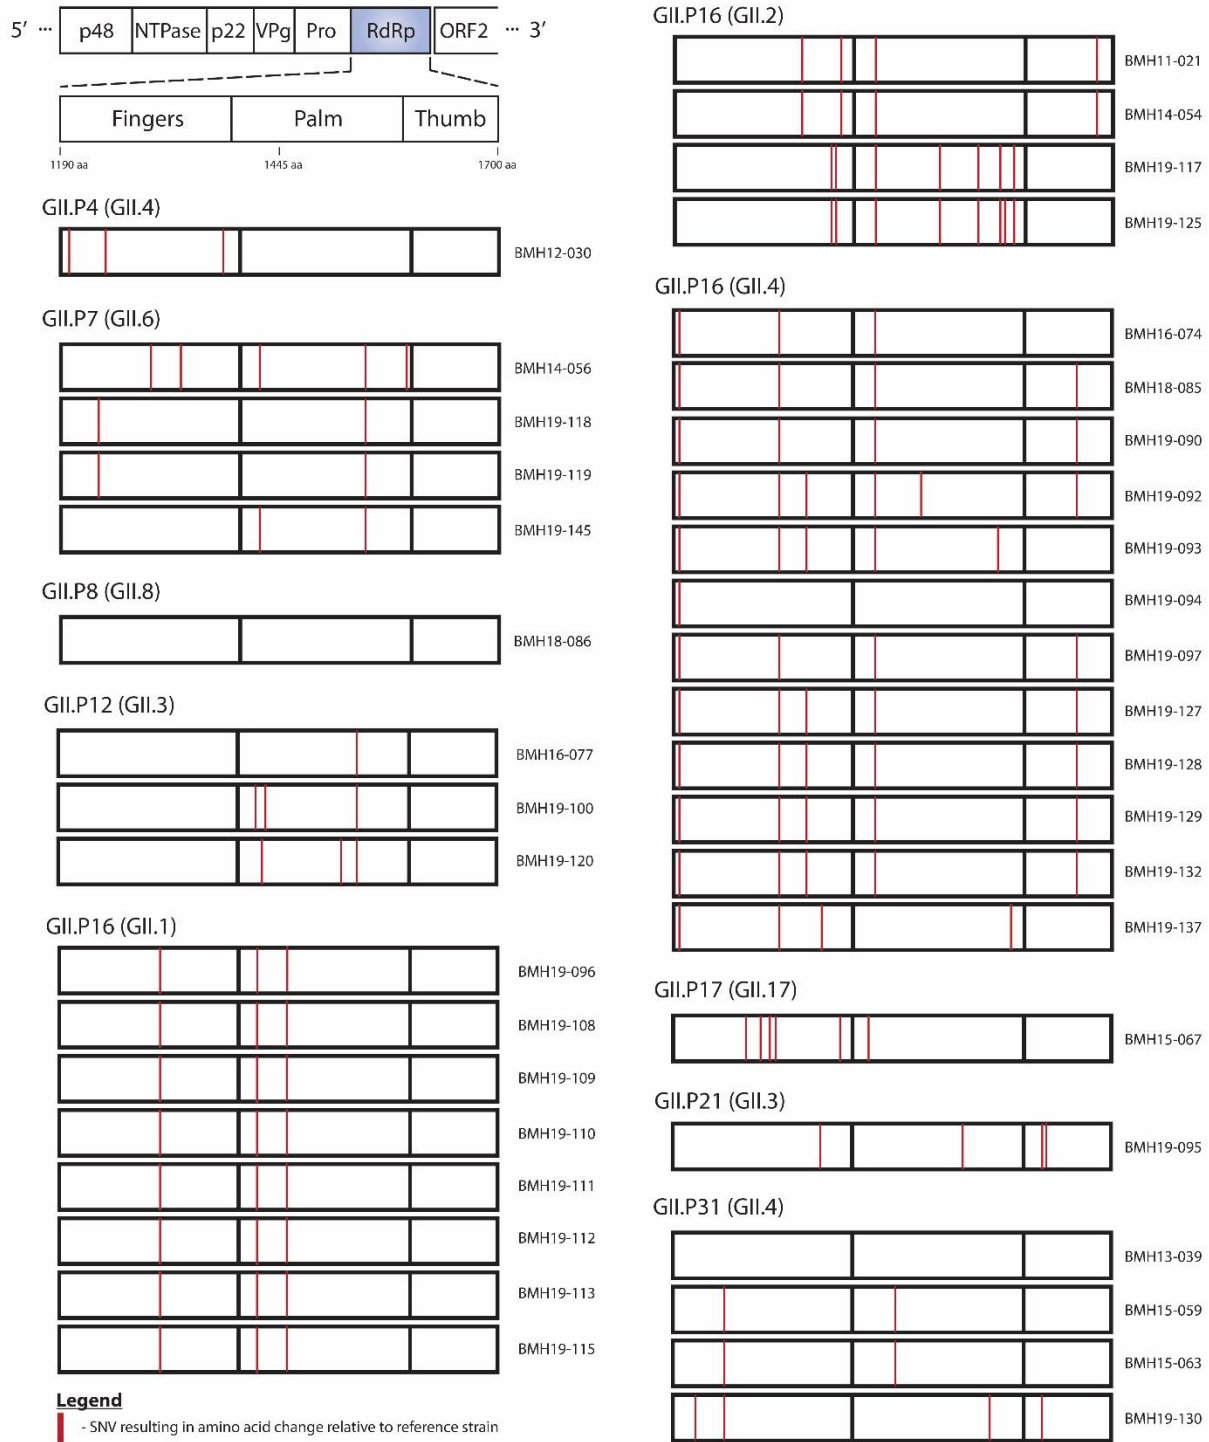



637 **Figure 7.**

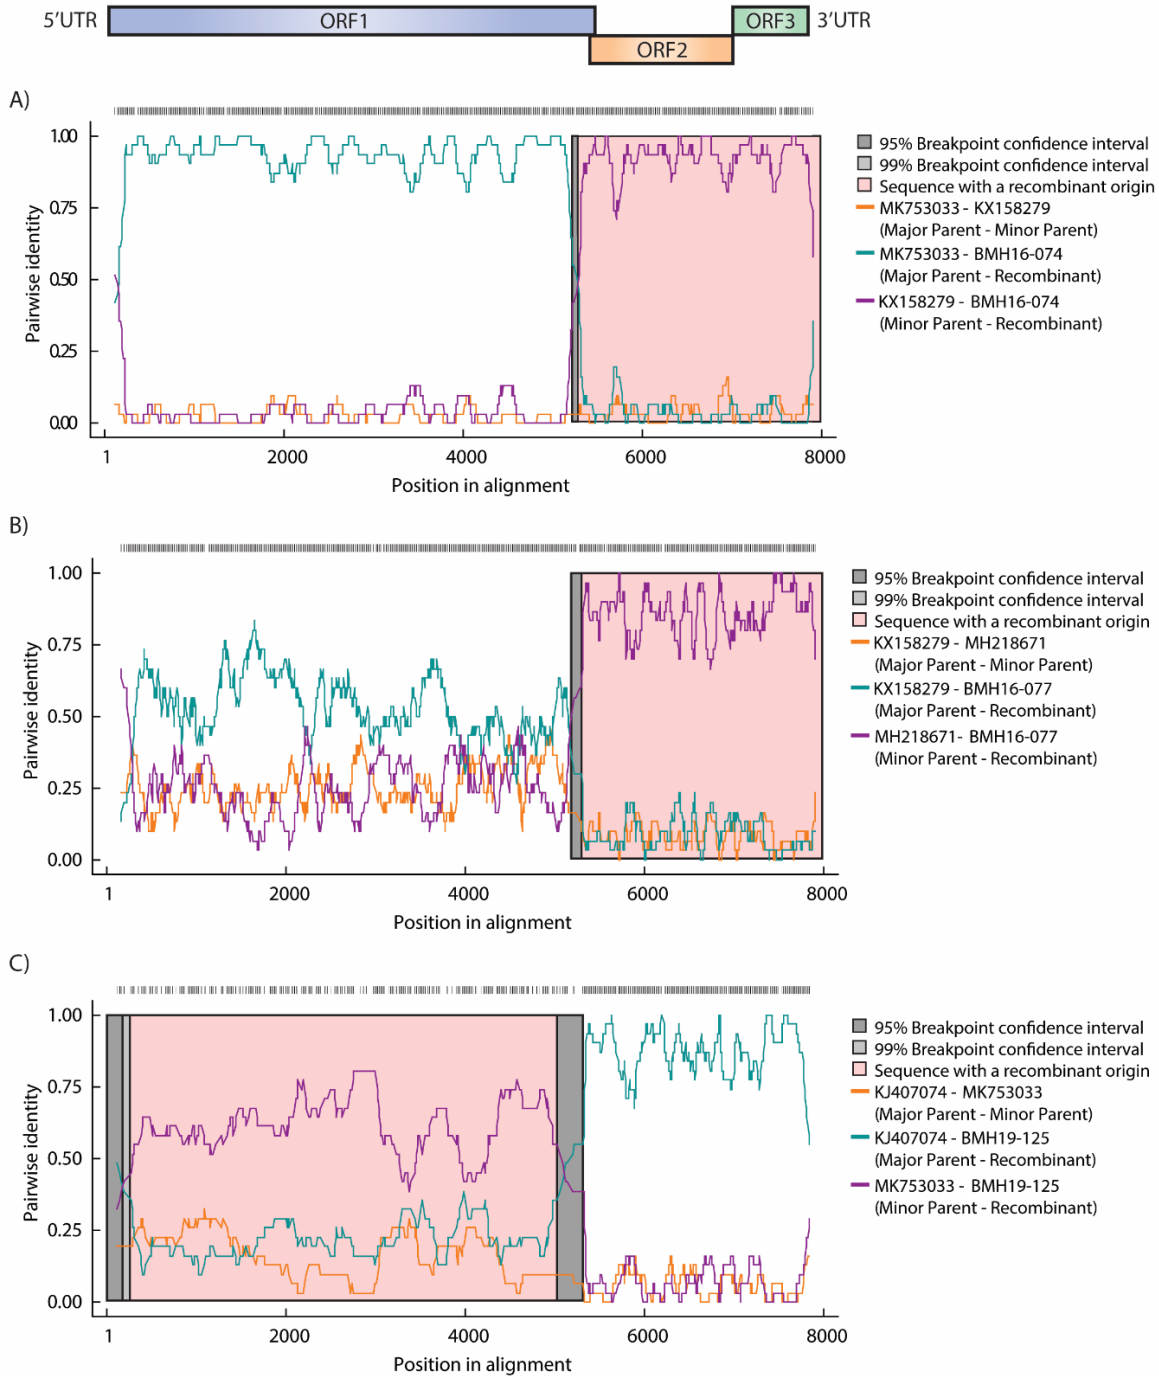

638

639
